# Supplementary material
Source: publisher site journal article supplement (https://www.spandidos-publications.com/392/downloadSupplementary)

Figure S1. KATNAL1 overexpression leads to maturation arrest in oocytes. (A) Immunofluorescence of EGFP tags revealed that EGFP-KL1 was located at the spindle poles of MI oocytes of mice. Tubulin is displayed in red, EGFP in green, and DNA in blue. Scale bar, 10  $\mu$ m. (B) At the MI stage, oocytes overexpressing KL1 had a wide spindle shape at the two poles. DNA is displayed in blue, tubulin in green, kinetochores in red. Scale bar, 20  $\mu$ m. (C) After 16 h of *in vitro* development, 1 Pb extrusion in oocytes decreased significantly compared to that in control cells. Scale bar, 100  $\mu$ m. \* $P$ <0.05 is considered to indicate statistically significant differences. Pb, polar body.

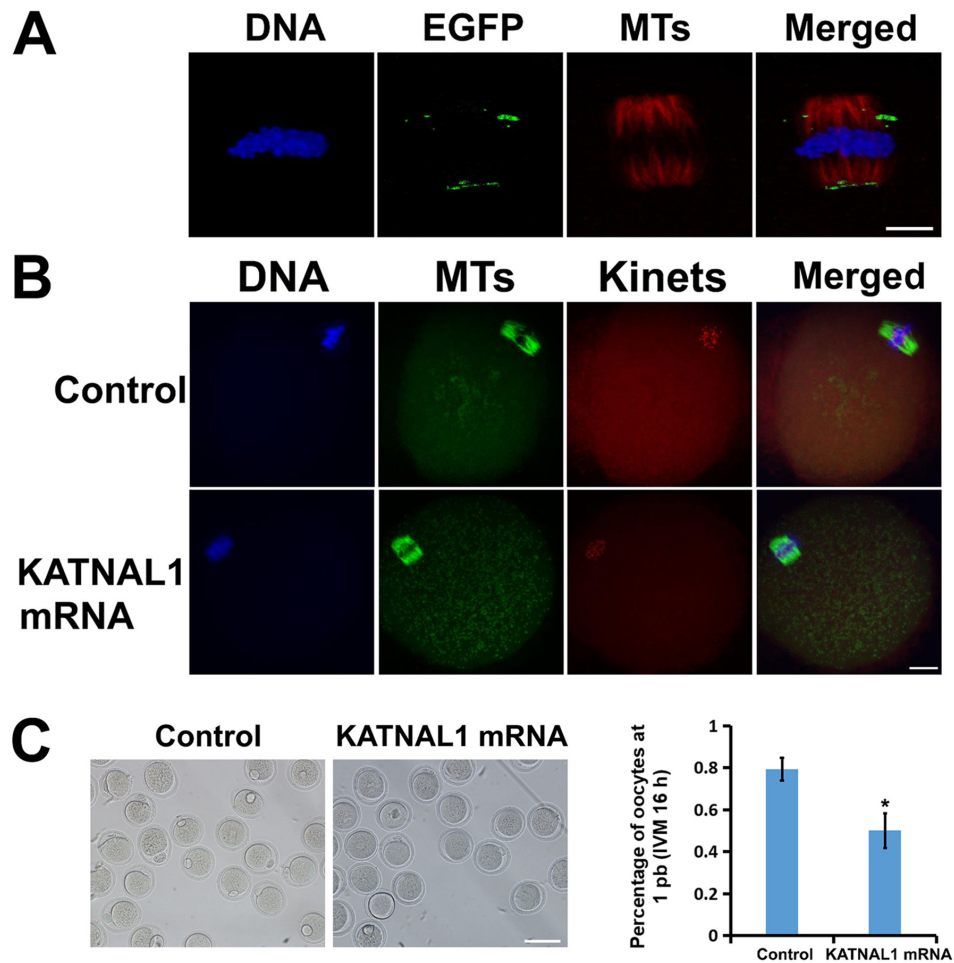

Supplement: Supplementary file 1 [file downloadSupplementary]
